# Supplementary material for: Effect of Combined Soil Amendment on Immobilization of Bioavailable As and Pb in Paddy Soil
Source: MDPI journal article supplement (doi:10.3390/toxics10020090), 2022-02-16
Supplement: s1 [file s1]

# Supplementary Materials: Effect of Combined Soil Amendment on Immobilization of Bioavailable As and Pb in Paddy Soil

Young-Kyu Hong, Jin-Wook Kim, Sang-Phil Lee, Jae-E. Yang and Sung-Chul Kim

**Table S1.** Weight of 100 rice grain measured after harvesting.

|           | Grain weight      |
|-----------|-------------------|
|           | g                 |
| Control   | $3.03 \pm 0.01^a$ |
| ALM10     | $2.83 \pm 0.04^a$ |
| ALM10+L   | $3.03 \pm 0.12^a$ |
| ALM10+FeO | $2.97 \pm 0.02^a$ |

<sup>a</sup> Significance was evaluated at  $p < 0.05$ .
